# Supplementary material
Source: MDPI journal article supplement (https://www.mdpi.com/2073-4344/12/11/1294)
Supplement: s1 [file s1 › catalysts-1917704-supplementary.pdf]

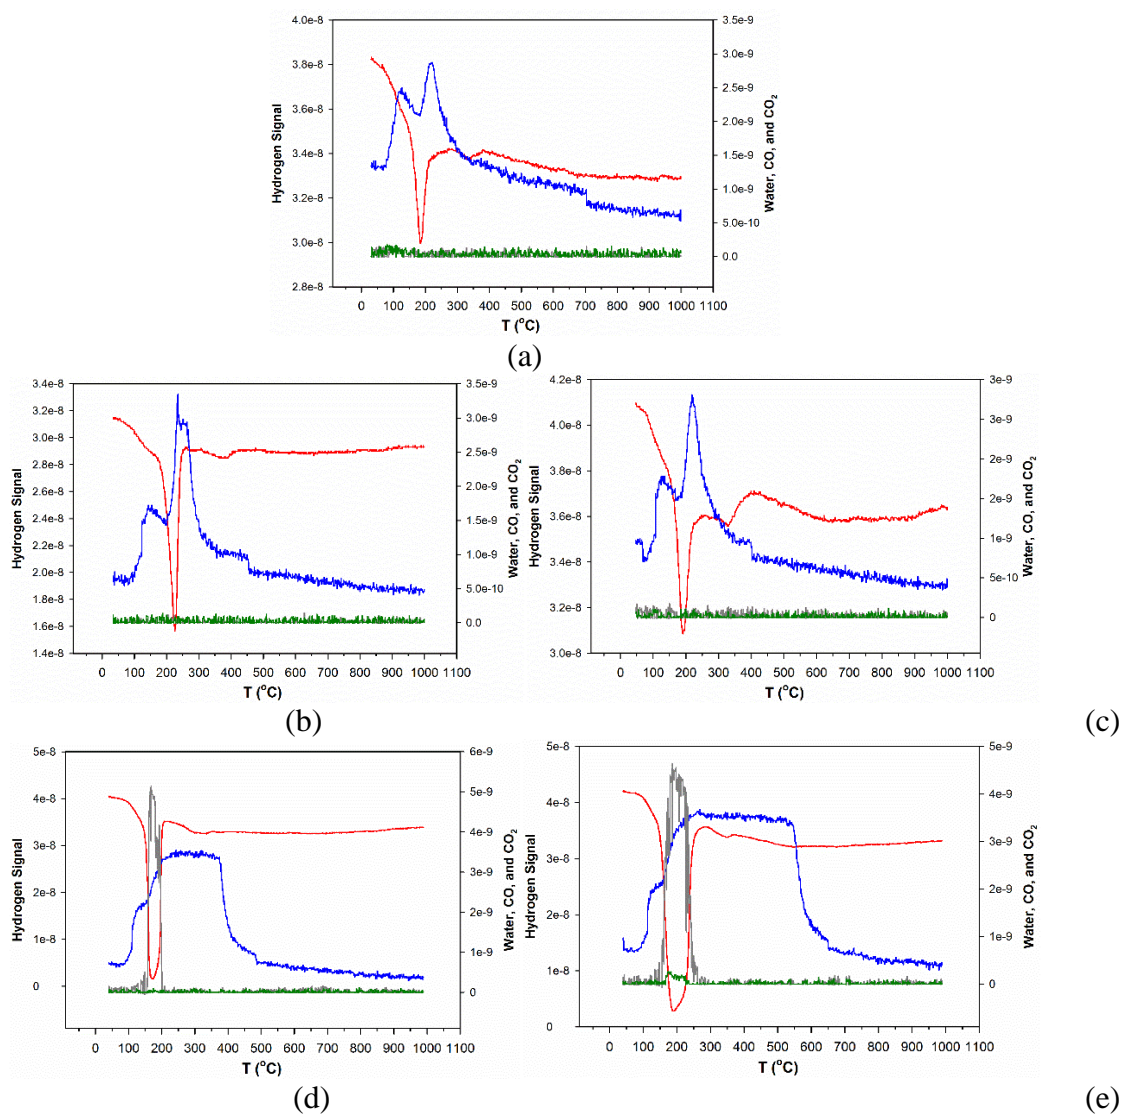

**Supplementary Information Figure S1.** TPR-MS profiles from [31] (reproduced with permission from Elsevier, Copyright 2021), with the following color code: (red) hydrogen, (blue) water, (gray) CO, and (green) CO<sub>2</sub>, including (a) unpromoted 2%Pt/m-ZrO<sub>2</sub>, and the same catalyst with (b) 0.5%Na, (c) 1%Na, (d) 2.5%Na, and (e) 5%Na.
